# Supplementary material for: Functional intratumoral lymphatics in patient-derived xenograft models of squamous cell carcinoma of the uterine cervix: implications for lymph node metastasis
Source: PubMed Central journal article supplement (PMC5302967; doi:10.18632/oncotarget.10931), 2016-07-29
Supplement: oncotarget-07-56986-s001.pdf [file oncotarget-07-56986-s001.pdf]

# Functional intratumoral lymphatics in patient-derived xenograft models of squamous cell carcinoma of the uterine cervix: implications for lymph node metastasis

## SUPPLEMENTARY FIGURE AND TABLES

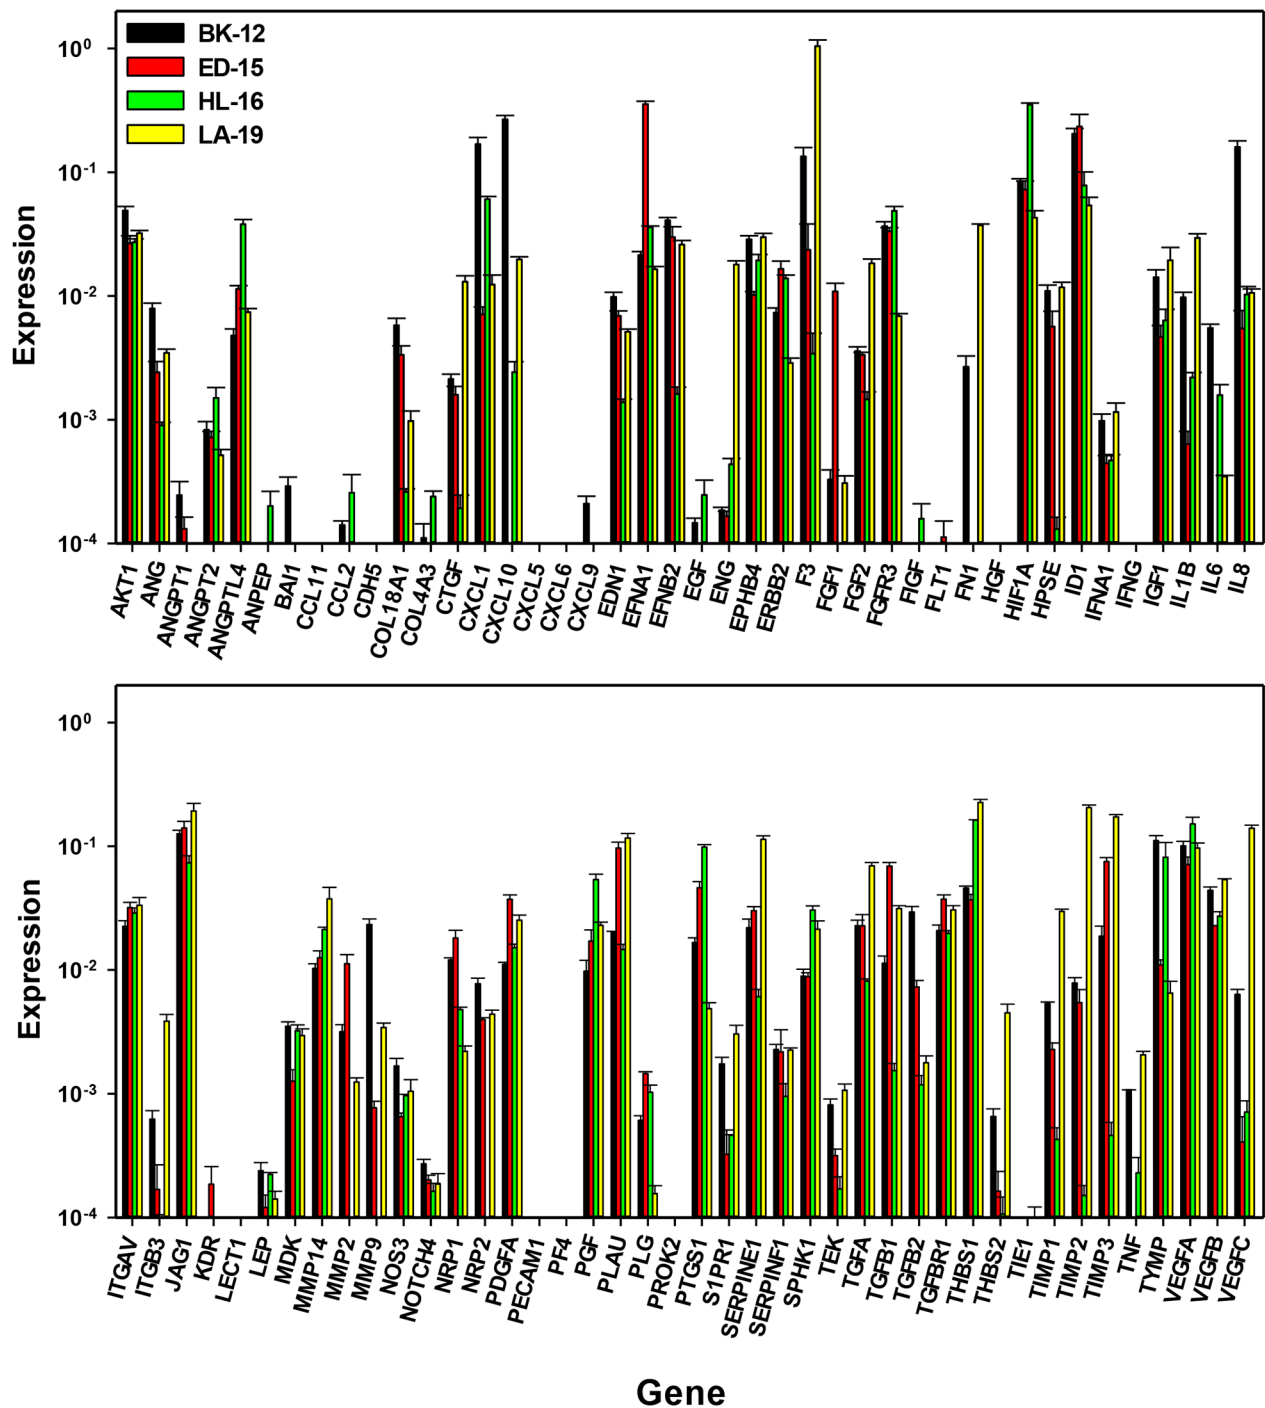

Supplementary Figure S1: Relative expression levels of angiogenesis-related genes in the BK-12, ED-15, HL-16, and LA-19 PDX models. Columns and bars, mean ± standard deviation (n = 3).

**Supplementary Table S1: Angiogenesis-related genes included in the PCR array\*.**

**See Supplementary File 1**

**Supplementary Table S2: Fold difference in gene expression between donor patient's tumor (DPT) and patient-derived xenograft (PDX) model**

**See Supplementary File 2**

**Supplementary Table S3: Fold difference in gene expression between highly metastatic (BK-12, LA-19) and poorly/non-metastatic (ED-15, HL-16) PDX models.**

**See Supplementary File 3**

**Supplementary Table S4: Genes with expression levels that differed between BK-12-E and BK-12-L tumors by a factor of at least 2\*.**

**See Supplementary File 4**
